# Supplementary material for: MicroRNA-Mediated Downregulation of HMGB2 Contributes to Cellular Senescence in Microvascular Endothelial Cells
Source: MDPI journal article supplement (doi:10.3390/cells11030584), 2022-02-08
Supplement: s1 [file s1]

**Table S1.** Primer sequences used for qRT-PCR.

| Gene        | Primer sequences                                                                      |
|-------------|---------------------------------------------------------------------------------------|
| PPIA/CYPA   | 5'-CCCACCGTGTCTTCGACAT-3'                                                             |
|             | 5'-CCAGTGCTCAGAGCACGAAA-3'                                                            |
| RPL13A      | 5'-CCTGGAGGAGAAGAGGAAAGAGA-3'                                                         |
|             | 5'-TTGAGGACCTCTGTGTATTTGTCAA-3'                                                       |
| HMGB2       | 5'-CTTGGCACGATATGCAGCAA-3'                                                            |
|             | 5'-CAGCCAAAGATAAACAACCATATGA-3'                                                       |
| CDKN1A/p16  | 5'-CATAGATGCCGCGGAAGGT-3'                                                             |
|             | 5'-CCCGAGGTTTCTCAGAGCCT-3'                                                            |
| CDKN1A/p21  | 5'-CTGCGCCAGCTGAGGTGTGAG-3'                                                           |
|             | 5'-GCCGCATGGGTCTTGACGGA-3'                                                            |
| miR-23a-3p  | 5'-ATCACATTGCCAGGGATTTC-3'                                                            |
| miR-23b-3p  | 5'-ATCACATTGCCAGGGATTACC-3'                                                           |
| miR-181a-5p | 5'-AACATTCAACGCTGTCTGGTGAGT-3'                                                        |
| miR-181b-5p | 5'-AACATTCATTGCTTGTCTGGTGGGT-3'                                                       |
| miR-221-3p  | 5'-AGCTACATTGTCTGCTGGGTTTC-3'                                                         |
| miR-222-3p  | 5'-AGCTACATCTGGCTACTGGGT-3'                                                           |
| mRQ 3'      | Reverse primers of miRNAs were provided in Mir-X™<br>miRNA First-Strand Synthesis Kit |

**Table S2.** The sequences of siRNA and miRNA mimics.

| Gene            | Primer sequences                |
|-----------------|---------------------------------|
| siControl       | 5'-CCUACGCCACCAAUUUCGUUU-3'     |
| siHMGB2 #1      | 5'-CUGAACAUCGCCCAAAGAU-3'       |
| siHMGB2 #2      | 5'-AGUGAACACCCUGGCCUAU-3'       |
| miRControl      | 5'-CCUCGUGCCGUUCCAUCAGGUAGUU-3' |
| hsa-miR-23a-3p  | 5'-AUCACAUUGCCAGGGAUUUCC-3'     |
| hsa-miR-23b-3p  | 5'-AUCACAUUGCCAGGGAUUACC-3'     |
| hsa-miR-181a-5p | 5'-AACAUUCAACGCUGUCGGUGAGU-3'   |
| hsa-miR-181b-5p | 5'-AACAUUCAUUGCUGUCGGUGGGU-3'   |
| hsa-miR-221-3p  | 5'-AGCUACAUUGUCUGCGGGUUUC-3'    |
| hsa-miR-222-3p  | 5'-AGCUACAUCUGGCUACUGGGU-3'     |

**Table S3.** The miRNA target prediction platform used in this study.

| Platform    | URL                                                                                                                                                                                             |
|-------------|-------------------------------------------------------------------------------------------------------------------------------------------------------------------------------------------------|
| miRSystem   | <a href="http://mirsystem.cgm.ntu.edu.tw/">http://mirsystem.cgm.ntu.edu.tw/</a>                                                                                                                 |
| miRDB       | <a href="http://www.mirdb.org/index.html">http://www.mirdb.org/index.html</a>                                                                                                                   |
| microT-CDS  | <a href="http://diana.imis.athena-innovation.gr/DianaTools/index.php?r=microT_CDS/index">http://diana.imis.athena-innovation.gr/DianaTools/index.php?r=microT_CDS/index</a>                     |
| TarBase_v.8 | <a href="https://carolina.imis.athena-innovation.gr/diana_tools/web/index.php?r=tarbasev8%2Findex">https://carolina.imis.athena-innovation.gr/diana_tools/web/index.php?r=tarbasev8%2Findex</a> |
| miRWalk     | <a href="http://mirwalk.umm.uni-heidelberg.de/">http://mirwalk.umm.uni-heidelberg.de/</a>                                                                                                       |
